# Supplementary material for: Thalamocortical axons control the cytoarchitecture of neocortical layers by area-specific supply of VGF
Source: eLife. 2022 Mar 15;11:e67549. doi: 10.7554/eLife.67549 (PMC8959604; doi:10.7554/eLife.67549)
Supplement: Figure 1—figure supplement 1—source data 1. [file elife-67549-fig1-figsupp1-data1.xlsx]

## Sheet: Sheet1
Fig1-sup1	C	E16		8.6005	9.44909	8.97334	18.4438	22.8712	35.8972	53.1584	60.1084	93.6404	100
		P0		7.27414	11.1437	20.1976	25.0987	52.907	96.082	87.3381	70.9107	100	65.6827	59.1665
		P7		13.9925	11.2529	16.9602	15.4835	27.4971	22.4827	53.9492	88.7832	91.2283	84.4775	97.7497	94.463	100	62.5303	48.3906	34.082	48.2708
