# Supplementary material for: Thalamocortical axons control the cytoarchitecture of neocortical layers by area-specific supply of VGF
Source: eLife. 2022 Mar 15;11:e67549. doi: 10.7554/eLife.67549 (PMC8959604; doi:10.7554/eLife.67549)
Supplement: Figure 1—source data 1. [file elife-67549-fig1-data1.xlsx]

## Sheet: Sheet1
Fig1	E	VB	Control	106585	117362	129375	131797	107008	109238	144811
			TCA-ablated	35642.4	42437.5	28585	28964	41976	29133	70872.1
		dLGN	Control	24903.2	32292.6	31841	48012	26909	29846	40794.6
			TCA-ablated	25218.6	25377	31426	28397	21661	22521	39298.8
