# Supplementary material for: Thalamocortical axons control the cytoarchitecture of neocortical layers by area-specific supply of VGF
Source: eLife. 2022 Mar 15;11:e67549. doi: 10.7554/eLife.67549 (PMC8959604; doi:10.7554/eLife.67549)
Supplement: Figure 2—figure supplement 1—source data 1. [file elife-67549-fig2-figsupp1-data1.xlsx]

## Sheet: Sheet1
Fig2-sup1	C	NeuN	Control	100	100	100	100
			TCA-ablated	93.0531	91.0139	104.397	97.136
		Cux1	Control	100	100	100	100	100	100	100
			TCA-ablated	86.7179	88.8983	82.341	97.9042	97.5692	90.5879	89.5019
