# Supplementary material for: Thalamocortical axons control the cytoarchitecture of neocortical layers by area-specific supply of VGF
Source: eLife. 2022 Mar 15;11:e67549. doi: 10.7554/eLife.67549 (PMC8959604; doi:10.7554/eLife.67549)
Supplement: Figure 2—figure supplement 2—source data 1. [file elife-67549-fig2-figsupp2-data1.xlsx]

## Sheet: Sheet1
Fig2-sup2	B	RORb/EdU	Control	58.5378	42.949	46.0533	53.4247	35.8494	36.5531	47.7395
			TCA-ablated	43.0515	44.9819	45.5478	22.1769	19.3856	20.8556	45.9187
		Brn2/EdU	Control	10.3611	10.3237	12.6243	20.1248	25.6496
			TCA-ablated	10.2267	11.7967	18.1423	14.2285	26.9861
		Ctip2/EdU	Control	2.45117	0.878635	1.01526	1.34352
			TCA-ablated	1.27046	1.23094	1.02275	0.436505
	D	VB	P1 Control	14	23	8
			P1 TCA-ablated	12	8
			P2 Control	26	12	5
			P2 TCA-ablated	5	7	2
			P3 Control	7	2	8
			P3 TCA-ablated	1	6	12
			P4 Control	8	2	12
			P4 TCA-ablated	22	10	30
			P5 Control	28	8	2
			P5 TCA-ablated	108	100	40
			P6 Control	26	7	18
			P6 TCA-ablated	201	119	137
			P7 Control	9	12	4	14
			P7 TCA-ablated	465	103	171	116
		L2-4	P1 Control	6	8	8
			P1 TCA-ablated	7	5
			P2 Control	10	2	4
			P2 TCA-ablated	7	13	7
			P3 Control	7	8	8
			P3 TCA-ablated	16	28	4
			P4 Control	16	12	5
			P4 TCA-ablated	34	24	13
			P5 Control	21.3333	12	16
			P5 TCA-ablated	8	17.3333	24
			P6 Control	19	35	30	80
			P6 TCA-ablated	21	31	12	68
			P7 Control	14	51	27	33
			P7 TCA-ablated	18	42	42	23
		L5-6	P1 Control	7	9	6
			P1 TCA-ablated	5	2
			P2 Control	11	8	18
			P2 TCA-ablated	36	24	8
			P3 Control	36	13	30.67
			P3 TCA-ablated	37	89	22.67
			P4 Control	50	20	21
			P4 TCA-ablated	72	52	33
			P5 Control	78	10	36
			P5 TCA-ablated	318	474	12
			P6 Control	21	17	35	104
			P6 TCA-ablated	199	139	79	344
			P7 Control	7	77	18	24
			P7 TCA-ablated	19	28	88	27
