# Supplementary material for: Thalamocortical axons control the cytoarchitecture of neocortical layers by area-specific supply of VGF
Source: eLife. 2022 Mar 15;11:e67549. doi: 10.7554/eLife.67549 (PMC8959604; doi:10.7554/eLife.67549)
Supplement: Figure 2—source data 1. [file elife-67549-fig2-data1.xlsx]

## Sheet: Sheet1
Fig2	C	S1	Control	100	100	100	100	100	100	100
			TCA-ablated	66.9992	58.9818	79.5235	74.3024	53.5999	68.4171	65.4174
		V1	Control	100	100	100	100	100
			TCA-ablated	154.406	129.84	91.0223	30.5447	135.61
		M1	Control	100	100	100	100
			TCA-ablated	145.631	108.756	85.3453	98.1308
	D		Control	100	100	100	100	100	100	100
			TCA-ablated	73.4657	73.0716	79.5235	78.2245	64.4385	72.9378	74.1781
	F		Control	100	100	100	100	100
			TCA-ablated	73.5841	60.8696	39.5902	70.4486	77.3543
