# Supplementary material for: Thalamocortical axons control the cytoarchitecture of neocortical layers by area-specific supply of VGF
Source: eLife. 2022 Mar 15;11:e67549. doi: 10.7554/eLife.67549 (PMC8959604; doi:10.7554/eLife.67549)
Supplement: Figure 3—source data 1. [file elife-67549-fig3-data1.xlsx]

## Sheet: Sheet1
Fig3	D	Brn2	Control	100	100	100	100	100	100
			TCA-ablated	83.2025	188.615	186.745	73.5768	75.4558	68.6569
		Ctip2	Control	100	100	100	100
			TCA-ablated	85.3108	92.3368	136.025	102.688
		Tbr1	Control	100	100	100	100
			TCA-ablated	49.546	56.3906	27.5522	78.3934
