# Supplementary material for: Thalamocortical axons control the cytoarchitecture of neocortical layers by area-specific supply of VGF
Source: eLife. 2022 Mar 15;11:e67549. doi: 10.7554/eLife.67549 (PMC8959604; doi:10.7554/eLife.67549)
Supplement: Figure 4—source data 1. [file elife-67549-fig4-data1.xlsx]

## Sheet: Sheet1
Fig4	C	NRN1	Control	100	100
			TCA-ablated	22.3804	14.3267
		VGF	Control	100	100	100	100
			TCA-ablated	9.40972	6.13626	19.8086	11.434	20.3944
