# Supplementary material for: Thalamocortical axons control the cytoarchitecture of neocortical layers by area-specific supply of VGF
Source: eLife. 2022 Mar 15;11:e67549. doi: 10.7554/eLife.67549 (PMC8959604; doi:10.7554/eLife.67549)
Supplement: Figure 5—figure supplement 2—source data 1. [file elife-67549-fig5-figsupp2-data1.xlsx]

## Sheet: Sheet1
Fig5-sup2	C		Control	100	100	100	100	100	100
			Control + e.p.	109.16	98.4645	101.162	103.834	93.9458	78.7003
