# Supplementary material for: Thalamocortical axons control the cytoarchitecture of neocortical layers by area-specific supply of VGF
Source: eLife. 2022 Mar 15;11:e67549. doi: 10.7554/eLife.67549 (PMC8959604; doi:10.7554/eLife.67549)
Supplement: Figure 5—source data 1. [file elife-67549-fig5-data1.xlsx]

## Sheet: Sheet1
Fig5	D	NRN1&VGF e.p.	Control	100	100	100	100	100	100
			TCA-ablated	74.873	80.0409	72.6029	85.0938	64.3202	76.7001
			TCA-ablated + e.p.	95.567	112.309	108.658	106.219	85.4721	88.8843
		NRN1 e.p.	Control	100	100	100	100	100
			TCA-ablated	82.1857	78.961	65.5703	71.4759	63.1815
			TCA-ablated + e.p.	84.6029	75.613	75.585	77.3506	71.2123
		VGF e.p.	Control	100	100	100	100	100
			TCA-ablated	88.4995	72.3618	78.1198	78.218	53.5035	84.626	58.7158
			TCA-ablated + e.p.	103.122	96.9168	95.3717	91.3482	83.6593	109.189	93.7972
