# Supplementary material for: Thalamocortical axons control the cytoarchitecture of neocortical layers by area-specific supply of VGF
Source: eLife. 2022 Mar 15;11:e67549. doi: 10.7554/eLife.67549 (PMC8959604; doi:10.7554/eLife.67549)
Supplement: Figure 6—source data 1. [file elife-67549-fig6-data1.xlsx]

## Sheet: Sheet1
Fig6	C	VB size	+/+	104682	96267.3	107270	110166	122280	123377	110042	120323
			-/-	118285	109842	102930	102536	115419	109613	98436.6	98304
