# Supplementary material for: Thalamocortical axons control the cytoarchitecture of neocortical layers by area-specific supply of VGF
Source: eLife. 2022 Mar 15;11:e67549. doi: 10.7554/eLife.67549 (PMC8959604; doi:10.7554/eLife.67549)
Supplement: Figure 7—figure supplement 1—source data 1. [file elife-67549-fig7-figsupp1-data1.xlsx]

## Sheet: Sheet1
Fig7-sup1	B	Body weight	+/+	5.58	4.41	5.92	5.23
			-/-	3.44	3.73	3.2	3.73	3.44
		Cortical size	+/+	56.5321	56.5891	59.1852	57.3997
			-/-	60.4014	61.0072	59.7278	61.9721	60.6907
	D		+/+	100	100	100	100
			-/-	127.918	110.856	98.6124	82.5958
	F		+/+	100	100	100	100
			-/-	112.896	125.367	82.1351	76.4601
	H	RORb/EdU	+/+	48.8379	48.939	51.6743	61.207
			-/-	33.1278	33.164	17.8027	36.0867
		Brn2/EdU	+/+	29.0646	33.0117	37.512	32.1766
			-/-	27.2195	28.5558	27.7794	34.6218
		Ctip2/EdU	+/+	1.66223	1.77308	2.42371	0.664452
			-/-	1.09872	0.653697	0.56862	0.310559
