# Supplementary material for: Thalamocortical axons control the cytoarchitecture of neocortical layers by area-specific supply of VGF
Source: eLife journal article supplement (doi:10.7554/elife.67549), 2022-03-15
Supplement: supp [file elife_poa_e67549_Figure_7_figure_supplement_2_source_data_1.xlsx]

## Sheet: Sheet1
Fig7-sup2	B		+/+	100	100	100	100
			-/-	100.845	109.236	97.409	104.324
