# Supplementary material for: Thalamocortical axons control the cytoarchitecture of neocortical layers by area-specific supply of VGF
Source: eLife journal article supplement (doi:10.7554/elife.67549), 2022-03-15
Supplement: supp [file elife_poa_e67549_Figure_7_source_data_1.xlsx]

## Sheet: Sheet1
Fig7	C	S1	+/+	100	100	100	100	100	100	100
			-/-	72.75	72.2063	78.6908	81.269	78.6473	68.9771	57.4536	53.6157	74.2516
		V1	+/+	100	100	100
			-/-	72.7273	71.8354	48.7738	102.361	54.4051
		M1	+/+	100	100	100	100
			-/-	95.7767	93.6594	112.75	85.3443
	D		+/+	100	100	100
			-/-	85.0746	86.9863	95.4787	93.1315	96.024
	G	Brn2	+/+	100	100	100	100	100	100	100
			-/-	211.534	317.235	59.5504	70.1613	79.3747	91.1198	114.428	69.1867	96.0085
		Ctip2	+/+	100	100	100	100	100	100	100
			-/-	155.191	132.941	104.632	100.894	119.68	97.6436	78.8672	60.9267	94.3775
	I		+/+	100	100	100	100
			-/-	80.9089	66.7388	59.1342	78.0831
	K		+/+	0.520648	0.366119	0.32139	0.349893
			-/-	0.167244	0.18864	0.304235	0.191576	0.106047
